# Supplementary material for: Differentiation of Polyamide 6, 6.6, and 12 Contaminations in Polyolefin-Recyclates Using HPLC Coupled to Drift-Tube Ion-Mobility Quadrupole Time-of-Flight Mass Spectrometry
Source: MDPI journal article supplement (doi:10.3390/polym13122032), 2021-06-21
Supplement: s1 [file s1]

**Table S1.** Structures of the cyclic compounds of PA 12.

| Name                                                      | Chemical<br>formula  | theoretical<br>m/z | chemical structure                                                                  |
|-----------------------------------------------------------|----------------------|--------------------|-------------------------------------------------------------------------------------|
| lauro lactam,<br>Azacyclotridecane-2-one                  | $C_{12}H_{23}NO$     | 198.1858           | 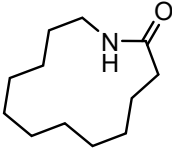  |
| 1,14-diazacyclohexacosane-<br>2,15-dione                  | $C_{24}H_{46}N_2O_2$ | 395.3638           |   |
| 1,14,27-<br>triazacyclononatriacontane-<br>2,15,28-trione | $C_{36}H_{69}N_3O_3$ | 592.5417           |  |

**Table S2.** Structures of the cyclic compounds of PA 6.

| Name                                                                                         | Chemical formula                                              | theoretical m/z | chemical structure                                                                   |
|----------------------------------------------------------------------------------------------|---------------------------------------------------------------|-----------------|--------------------------------------------------------------------------------------|
| $\epsilon$ -caprolactam, Azepan-2-one                                                        | C <sub>6</sub> H <sub>11</sub> NO                             | 114.0919        | 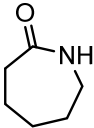    |
| caprolactam cyclic dimer, 1,8-Diazacyclotetradecane-2,9-dione                                | C <sub>12</sub> H <sub>22</sub> N <sub>2</sub> O <sub>2</sub> | 227.1760        |    |
| caprolactam cyclic trimer, 1,8,15-Triazacycloheneicosane-2,9,16-trione                       | C <sub>18</sub> H <sub>33</sub> N <sub>3</sub> O <sub>3</sub> | 340.2600        |    |
| caprolactam cyclic tetramer, 1,8,15,22-Tetraazacyclooctacosane-2,9,16,23-tetrone             | C <sub>24</sub> H <sub>44</sub> N <sub>4</sub> O <sub>4</sub> | 453.3441        |   |
| caprolactam cyclic pentamer, 1,8,15,22,29-Pentaazacyclopentatriacontane-2,9,16,23,30-pentone | C <sub>30</sub> H <sub>55</sub> N <sub>5</sub> O <sub>5</sub> | 566.3890        |  |

---

caprolactam cyclic  
hexamer,  
1,8,15,22,29,36-  
Hexaazacyclodotetracont  
ane-2,9,16,23,30,37-hexone

$C_{36}H_{66}N_6O_6$  679.4339

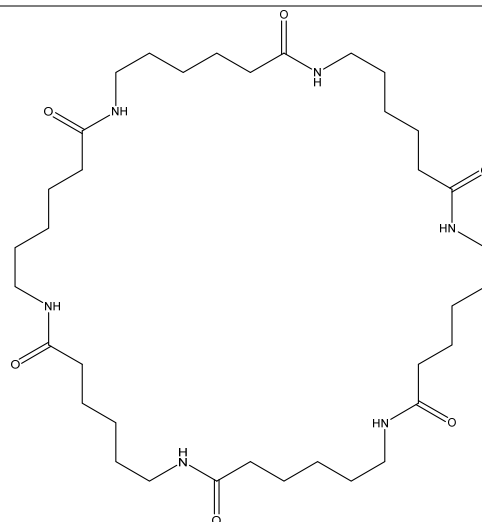

**Table S3.** Structures of the cyclic compounds of PA 6.6.

| Name                                                               | Chemical formula     | theoretical m/z | chemical structure                                                                  |
|--------------------------------------------------------------------|----------------------|-----------------|-------------------------------------------------------------------------------------|
| 1,7-Diazacyclotetradecane-8,14-dione                               | $C_{12}H_{22}N_2O_2$ | 227.1760        | 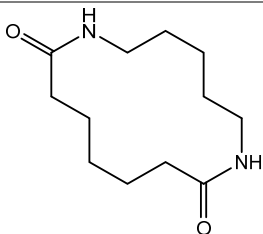  |
| 1,7,15,21-Tetraazacyclooctacosane-8,14,22,28-tetrone               | $C_{24}H_{44}N_4O_4$ | 453.3441        |   |
| 1,7,15,21,29,35-Hexaazacyclodotetracontane-8,14,22,28,36,42-hexone | $C_{36}H_{66}N_6O_6$ | 679.4339        |  |
